# Supplementary material
Source: PubMed Central journal article supplement (PMC2176164)

## Online supplementary data

### Results of windtunnel experiments with (a) *C. glomerata* and (b) *C. rubecula*.

Each value represents the cumulative results from sub experiments performed on at least three different days, grouped per experience and treatment, except for those points indicated with \*, which were collected from two different days

#### Ia:

| oviposition | treatment     | Time after treatment (h) | response to nasturtium | response to cabbage | N (responding) | N (total) |
|-------------|---------------|--------------------------|------------------------|---------------------|----------------|-----------|
| naïve       | sucrose       | 24                       | 12                     | 44                  | 56             | 79        |
| naïve       | sucrose + ACD | 24                       | 18                     | 39                  | 57             | 82        |
| naïve       | sucrose + ANI | 24                       | 2                      | 21                  | 23             | 27*       |
| single      | sucrose       | 1                        | 26                     | 9                   | 35             | 39        |
| single      | sucrose       | 4                        | 41                     | 13                  | 54             | 65        |
| single      | sucrose       | 24                       | 56                     | 29                  | 85             | 97        |
| single      | sucrose + ACD | 24                       | 17                     | 54                  | 71             | 80        |
| 3 massed    | sucrose       | 24                       | 35                     | 19                  | 54             | 58        |
| 3 massed    | sucrose + ACD | 24                       | 10                     | 23                  | 33             | 38        |
| 3 spaced    | sucrose + ACD | 24                       | 16                     | 35                  | 51             | 54        |
| 3 spaced    | sucrose + ACD | 1                        | 42                     | 17                  | 59             | 67        |
| 3 spaced    | sucrose       | 1                        | 72                     | 15                  | 87             | 95        |
| 3 spaced    | sucrose       | 4                        | 49                     | 14                  | 63             | 76        |
| 3 spaced    | sucrose       | 24                       | 35                     | 14                  | 49             | 54        |
| 3 spaced    | sucrose       | 120                      | 47                     | 16                  | 63             | 71        |
| 3 spaced    | sucrose + ANI | 1                        | 31                     | 5                   | 36             | 38        |
| 3 spaced    | sucrose + ANI | 4                        | 12                     | 28                  | 40             | 46        |
| 3 spaced    | sucrose + ANI | 24                       | 12                     | 21                  | 33             | 38        |
| 3 spaced    | sucrose + ANI | 120                      | 13                     | 28                  | 41             | 48        |

Results of windtunnel experiments with *C. rubecula*.

| oviposition | treatment     | Time after treatment (h) | response to nasturtium | response to cabbage | N (responding) | N (total) |
|-------------|---------------|--------------------------|------------------------|---------------------|----------------|-----------|
| naive       | sucrose       | 24                       | 3                      | 21                  | 24             | 70        |
| naive       | sucrose + ACD | 24                       | 6                      | 18                  | 24             | 57        |
| naive       | sucrose + ANI | 24                       | 2                      | 18                  | 20             | 27*       |
| single      | sucrose       | 1                        | 46                     | 22                  | 68             | 84        |
| single      | sucrose       | 4                        | 38                     | 15                  | 53             | 64        |
| single      | sucrose       | 24                       | 6                      | 23                  | 29             | 36        |
| 3 massed    | sucrose       | 24                       | 7                      | 27                  | 34             | 38        |
| 3 spaced    | sucrose + ACD | 24                       | 36                     | 40                  | 76             | 98        |
| 3 spaced    | sucrose + ACD | 1                        | 33                     | 2                   | 35             | 38*       |
| 3 spaced    | sucrose       | 1                        | 64                     | 5                   | 69             | 77        |
| 3 spaced    | sucrose       | 4                        | 46                     | 4                   | 50             | 61        |
| 3 spaced    | sucrose       | 24                       | 89                     | 26                  | 115            | 150       |
| 3 spaced    | sucrose       | 48                       | 22                     | 7                   | 29             | 35        |
| 3 spaced    | sucrose       | 72                       | 20                     | 8                   | 28             | 41        |
| 3 spaced    | sucrose       | 96                       | 29                     | 8                   | 37             | 45        |
| 3 spaced    | sucrose       | 120                      | 56                     | 15                  | 71             | 91        |
| 3 spaced    | sucrose + ANI | 1                        | 22                     | 4                   | 26             | 30*       |
| 3 spaced    | sucrose + ANI | 4                        | 28                     | 6                   | 34             | 42        |
| 3 spaced    | sucrose + ANI | 24                       | 29                     | 23                  | 52             | 66        |
| 3 spaced    | sucrose + ANI | 48                       | 22                     | 18                  | 40             | 50        |
| 3 spaced    | sucrose + ANI | 72                       | 9                      | 20                  | 29             | 40        |
| 3 spaced    | sucrose + ANI | 96                       | 15                     | 28                  | 43             | 51        |
| 3 spaced    | sucrose + ANI | 120                      | 13                     | 26                  | 39             | 48        |

*C.glomerata* survival rate with ACD

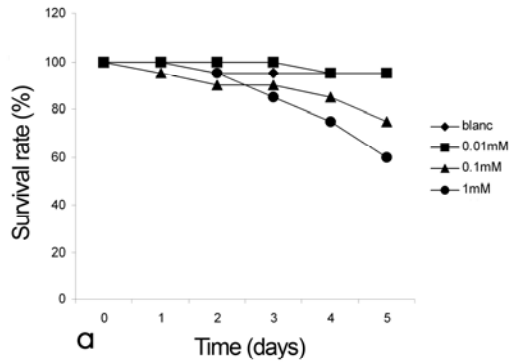

*C.rubecula* survival rate with ACD

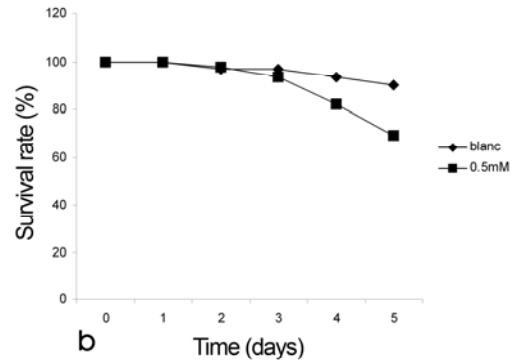

*C.glomerata* survival rate with ANI

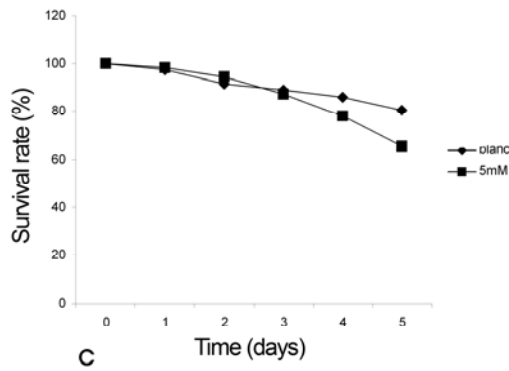

*C.rubecula* survival rate with ANI

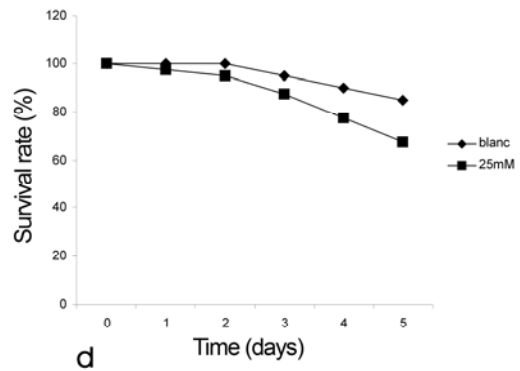

(a). Survival rate of *C. glomerata* wasps, fed 0.5 $\mu$ l sucrose solution with different concentrations of ACD. N = 50 per treatment (b) Survival rate of *C. rubecula* wasps, fed 0.5 $\mu$ l sucrose solution with 0.5mM ACD in 2% sucrose (N = 45) or sucrose alone (N=30) (c). Survival rate of *C. glomerata* wasps, fed 5mM ANI in 2 % sucrose (N=55) or sucrose alone (N= 36) (d). Survival rate of *C. rubecula* wasps, fed 25mM ANI in 2% sucrose (N= 40) or sucrose alone (N= 20).

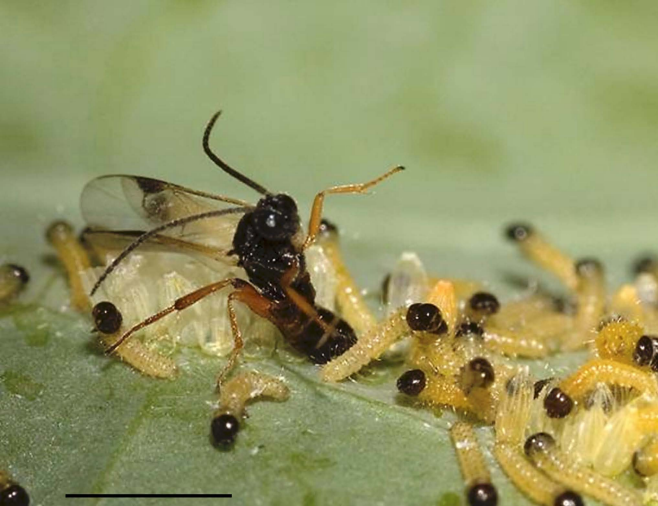

Supplement: rspb20070305s08.pdf [file rspb20070305s08.pdf]
